# Supplementary material
Source: MDPI journal article supplement (https://www.mdpi.com/search?q=suschem-02-00008)
Supplement: s001 [file suschem-02-00008-s001.pdf]

# SUPPORTING INFORMATION

## Ecotoxicity & Hemolytic Activity of Fluorinated Ionic Liquids

Nicole S. M. Vieira <sup>1</sup>, Ana L. S. Oliveira <sup>1</sup>, João M. M. Araújo <sup>1</sup>, M. Manuela Gaspar <sup>2</sup> and Ana B. Pereira <sup>1,\*</sup>

<sup>1</sup> LAQV, REQUIMTE, Departamento de Química, Faculdade de Ciências e Tecnologia, Universidade Nova de Lisboa, 2829-516 Caparica, Portugal; ns.vieira@campus.fct.unl.pt (N. S. M. V.); als.oliveira@campus.fct.unl.pt (A. L. S. O.); jmmda@fct.unl.pt (J. M. M. A.); anab@fct.unl.pt (A. B. P.)

<sup>2</sup> Research Institute for Medicines (iMed.U LISBOA), Faculty of Pharmacy, Universidade de Lisboa, Av. Prof. Gama Pinto, 1649-003 Lisboa, Portugal; mgaspar@ff.ulisboa.pt (M. M. G.)

\* Correspondence: anab@fct.unl.pt; Tel.: (+351) 212948318

Received: 28 January 2021; Accepted: 23 February 2021; Published: date

**Table S1.** MIC value of different FILs against *Pseudomonas stutzeri* in  $\mu\text{M}$ .

| FIL                                                                                | MIC ( $\mu\text{M}$ ) |
|------------------------------------------------------------------------------------|-----------------------|
| [C <sub>2</sub> C <sub>1</sub> Im][CF <sub>3</sub> SO <sub>3</sub> ]               | 400,000               |
| [C <sub>8</sub> C <sub>1</sub> Im][CF <sub>3</sub> SO <sub>3</sub> ]               | 10,000                |
| [C <sub>2</sub> C <sub>1</sub> Im][C <sub>4</sub> F <sub>9</sub> CO <sub>2</sub> ] | 300,000               |
| [C <sub>2</sub> C <sub>1</sub> Im][C <sub>4</sub> F <sub>9</sub> SO <sub>3</sub> ] | 200,000               |
| [C <sub>8</sub> C <sub>1</sub> Im][C <sub>4</sub> F <sub>9</sub> SO <sub>3</sub> ] | >2 930 <sup>1</sup>   |
| [C <sub>2</sub> C <sub>1</sub> py][C <sub>4</sub> F <sub>9</sub> CO <sub>2</sub> ] | 200,000               |
| [C <sub>2</sub> C <sub>1</sub> py][C <sub>4</sub> F <sub>9</sub> SO <sub>3</sub> ] | 100,000               |
| [N <sub>1112</sub> (OH)][C <sub>4</sub> F <sub>9</sub> CO <sub>2</sub> ]           | 400,000               |
| [N <sub>1112</sub> (OH)][C <sub>4</sub> F <sub>9</sub> SO <sub>3</sub> ]           | 300,000               |

<sup>1</sup>Maximum tested concentration.

Table S2. Hemolysis (%) as function of concentration determined for several FILs.

| [C <sub>8</sub> C <sub>1</sub> Im][CF <sub>3</sub> SO <sub>3</sub> ]               |            |             |             |             |             |
|------------------------------------------------------------------------------------|------------|-------------|-------------|-------------|-------------|
| μM                                                                                 | 54,787     | 27,393      | 13,697      | 6 848       | 3 424       |
| Hemolysis (%)                                                                      | 90.1±7.05  | 69.3±7.91   | 3.15±1.29   | 0.109±0.000 | 0.061±0.016 |
| [C <sub>2</sub> C <sub>1</sub> Im][C <sub>4</sub> F <sub>9</sub> CO <sub>2</sub> ] |            |             |             |             |             |
| μM                                                                                 | 266,092    | 133,046     | 66,523      | 33,261      | 16,631      |
| Hemolysis (%)                                                                      | 91.7±3.07  | 81.4±5.48   | 0.120±0.040 | 0.184±0.092 | 0.000±0.000 |
| [C <sub>2</sub> C <sub>1</sub> Im][C <sub>4</sub> F <sub>9</sub> SO <sub>3</sub> ] |            |             |             |             |             |
| μM                                                                                 | 121,745    | 60,872      | 30,436      | 15,218      | 7 609       |
| Hemolysis (%)                                                                      | 65.7±4.93  | 57.4±1.47   | 3.23±0.418  | 0.109±0.052 | 0.109±0.032 |
| [C <sub>8</sub> C <sub>1</sub> Im][C <sub>4</sub> F <sub>9</sub> SO <sub>3</sub> ] |            |             |             |             |             |
| μM                                                                                 | 2 648      | 1 324       | 663         | 332         | 166         |
| Hemolysis (%)                                                                      | 4.52±1.43  | 0.000±0.000 | 0.254±0.048 | 0.000±0.000 | 0.045±0.000 |
| [C <sub>2</sub> C <sub>1</sub> py][C <sub>4</sub> F <sub>9</sub> CO <sub>2</sub> ] |            |             |             |             |             |
| μM                                                                                 | 252,705    | 126,352     | 63,176      | 31,588      | 15,794      |
| Hemolysis (%)                                                                      | 81.1±1.26  | 67.8±9.37   | 0.447±0.087 | 0.318±0.048 | 0.000±0.000 |
| [C <sub>2</sub> C <sub>1</sub> py][C <sub>4</sub> F <sub>9</sub> SO <sub>3</sub> ] |            |             |             |             |             |
| μM                                                                                 | 57,101     | 28,550      | 14,275      | 7 138       | 3 569       |
| Hemolysis (%)                                                                      | 54.1±1.92  | 0.806±0.248 | 0.045±0.000 | 0.000±0.000 | 0.000±0.000 |
| [N <sub>1112</sub> (OH)][C <sub>4</sub> F <sub>9</sub> CO <sub>2</sub> ]           |            |             |             |             |             |
| μM                                                                                 | 68,088     | 34,044      | 17,022      | 8 511       | 4 256       |
| Hemolysis (%)                                                                      | 82.5±2.50  | 88.6±1.89   | 56.1±10.2   | 3.60±0.048  | 0.045±0.032 |
| [N <sub>1112</sub> (OH)][C <sub>4</sub> F <sub>9</sub> SO <sub>3</sub> ]           |            |             |             |             |             |
| μM                                                                                 | 153,231    | 76,615      | 38,308      | 19,154      | 9 577       |
| Hemolysis (%)                                                                      | 92.4±0.064 | 102±1.59    | 38.3±3.31   | 0.270±0.164 | 0.238±0.032 |

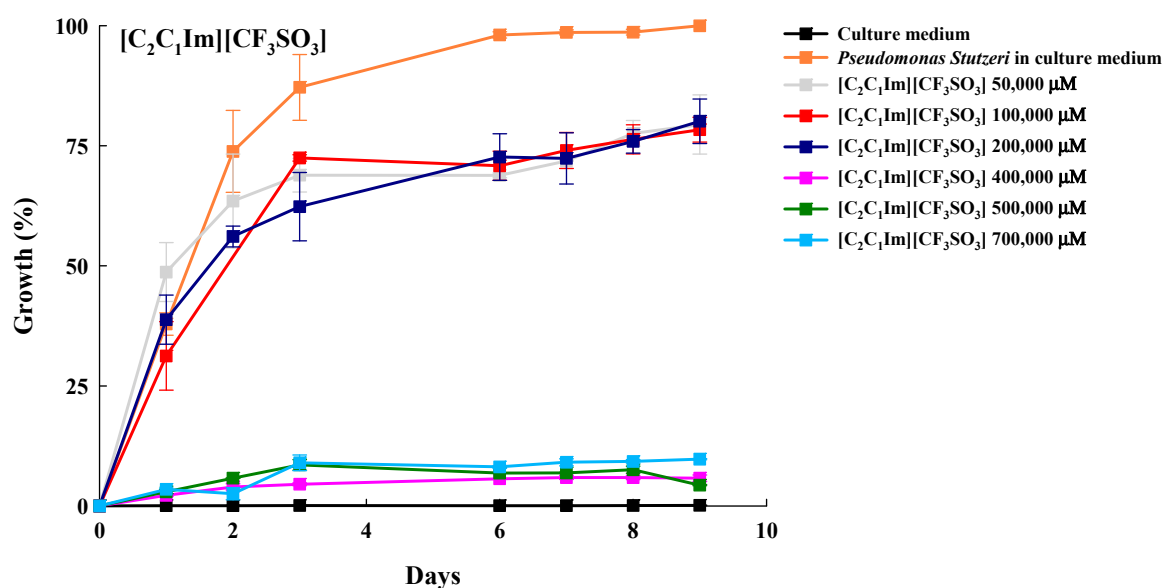

Figure S1. *Pseudomonas stutzeri* growth curves for different concentrations of 1-ethyl-3-methylimidazolium perfluoromethanesulfonate [C<sub>2</sub>C<sub>1</sub>Im][CF<sub>3</sub>SO<sub>3</sub>].

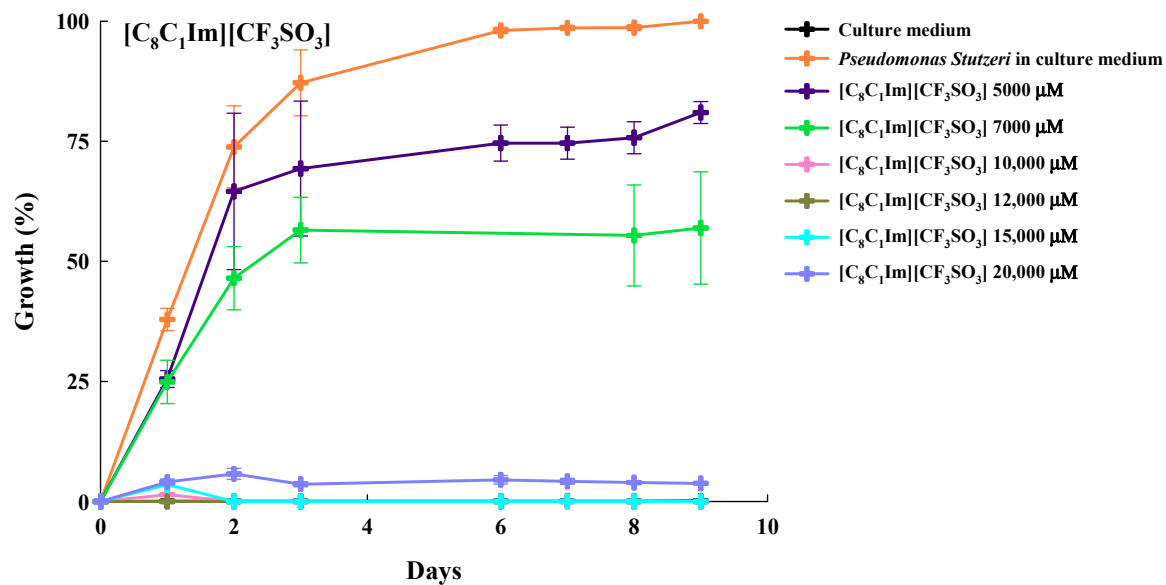

**Figure S2.** *Pseudomonas stutzeri* growth curves for different concentrations of 1-methyl-3-octylimidazolium perfluoromethanesulfonate [C<sub>8</sub>C<sub>1</sub>Im][CF<sub>3</sub>SO<sub>3</sub>].

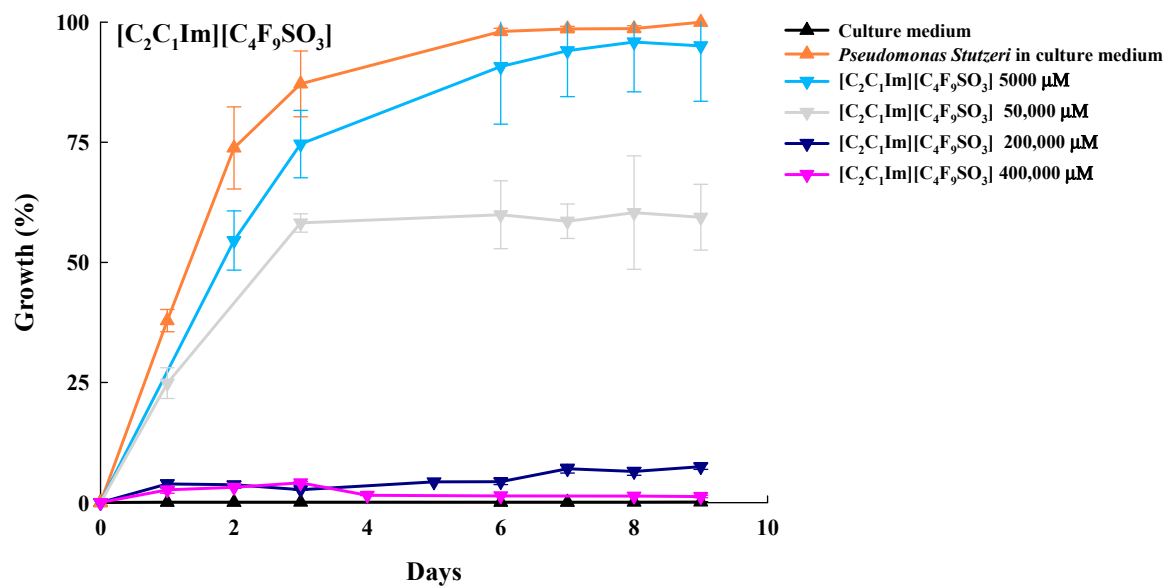

**Figure S3.** *Pseudomonas stutzeri* growth curves for different concentrations of 1-ethyl-3-methylimidazolium perfluorobutanesulfonate [C<sub>2</sub>C<sub>1</sub>Im][C<sub>4</sub>F<sub>9</sub>SO<sub>3</sub>].

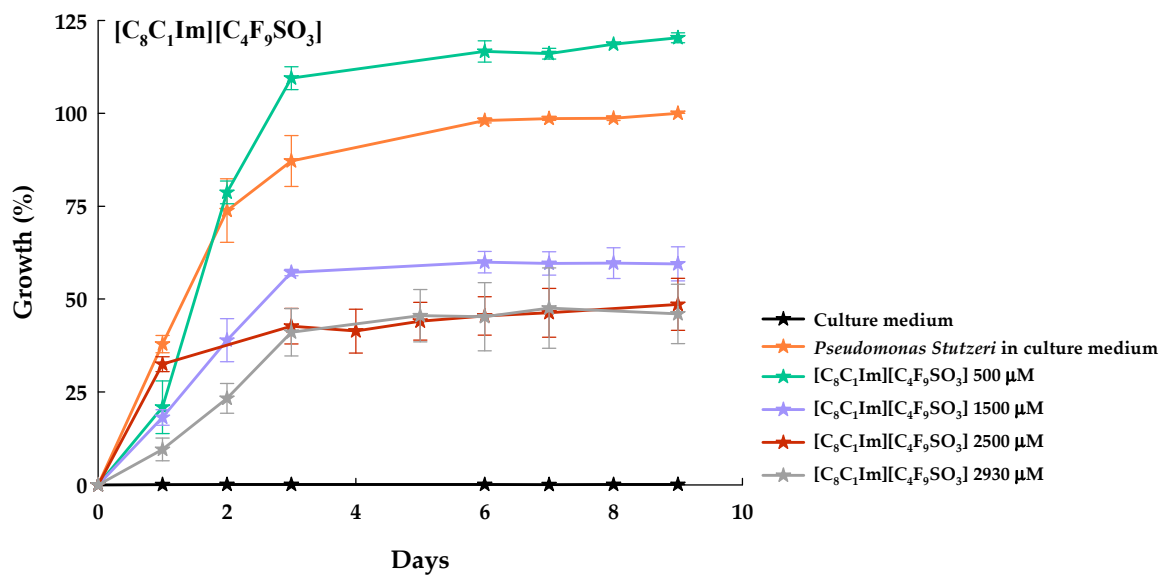

**Figure S4.** *Pseudomonas stutzeri* growth curves for different concentrations of 1-methyl-3-octylimidazolium perfluorobutanesulfonate [C<sub>8</sub>C<sub>1</sub>Im][C<sub>4</sub>F<sub>9</sub>SO<sub>3</sub>].
